# Supplementary material
Source: Springer Nature journal article supplement (https://www.springermedizin.de/resource/supplementary/12891_2010_1036_MOESM7_ESM.pdf/9507398)
Supplement: MOESM7 [file 9507398]

**Table 1 Age and gender thresholds for study inclusion**

|                                                 | <b>Male</b> | <b>Female</b> |
|-------------------------------------------------|-------------|---------------|
| Range of knee joint flexion                     |             |               |
| 55-64 years                                     | <128°       | <127°         |
| 65-74 years                                     | <125°       | <122°         |
| 75+ years                                       | <120°       | <117°         |
| Isometric quadriceps strength (kilograms force) |             |               |
| 55-64 years                                     | <18.1       | <11.3         |
| 65-74 years                                     | <17.2       | <9.4          |
| 75+ years                                       | <13.9       | <9.0          |
| Single-leg standing balance (seconds)           |             |               |
| 55-64 years                                     | <8          | <5            |
| 65-74 years                                     | <3          | <3            |
| 75+ years                                       | <2          | <2            |
